# Supplementary material for: The lysosomal proteome of senescent cells contributes to the senescence secretome
Source: PubMed Central journal article supplement (PMC9577959; doi:10.1111/acel.13707), 2022-09-10
Supplement: ACEL-21-e13707-s002.pdf [file ACEL-21-e13707-s002.pdf]

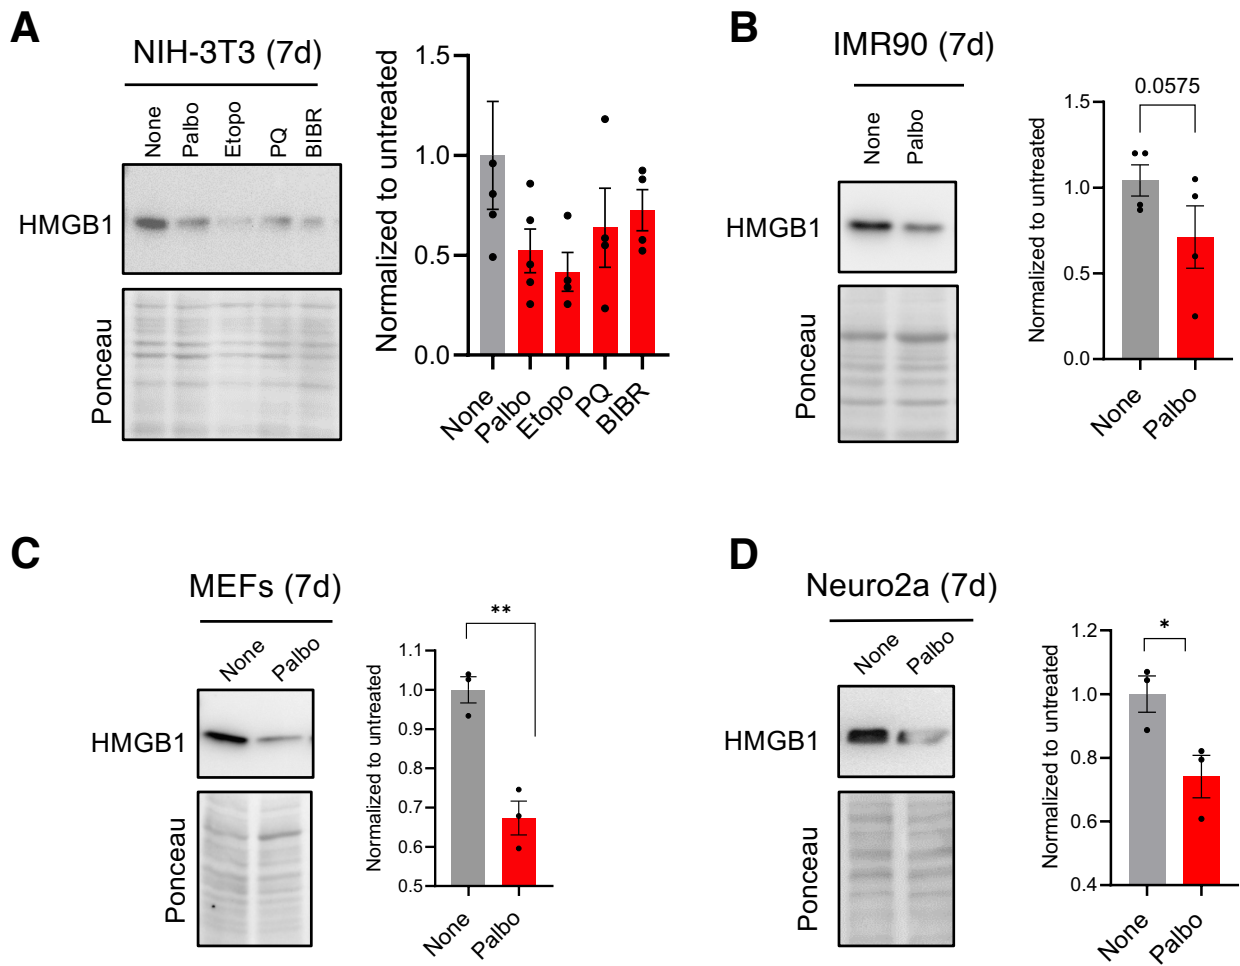

Supplementary Figure 1

**Supplementary Figure 1.**

- A,** *Left:* Representative immunoblot for HMGB1 of NIH3T3 cells untreated (None) or 7 days after exposure to the indicated agents. Ponceau staining is shown as loading control. *Right:* Quantification of HMGB1 levels from n = 4 independent experiments. Values are expressed relative to untreated cells and are individual values and mean  $\pm$  SEM.
- B,** *Left:* Representative immunoblot for HMGB1 of human fibroblasts (IMR90 population doubling level (PDL) 20 untreated (None) or 7 days after exposure to palbociclib. Ponceau staining is shown as loading control. *Right:* Quantification of HMGB1 levels from n = 4 independent experiments. Values are expressed relative to untreated cells and are individual values and mean  $\pm$  SEM of three independent experiments.
- C,** Similar to B using primary mouse embryonic fibroblasts (MEFs).
- D,** Similar to B using Neuro2a cells (N2a).
- Statistical significance was estimated by 1-way ANOVA test (in A) and unpaired t-test in B-D, \*\* p<0.01, \* p<0.05.

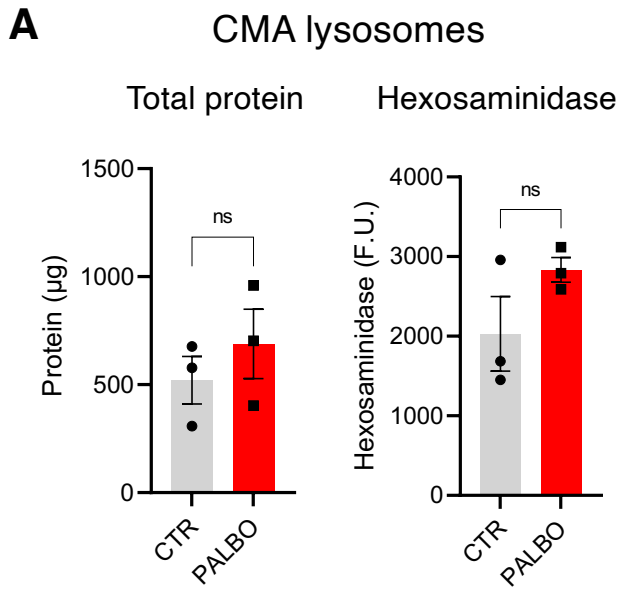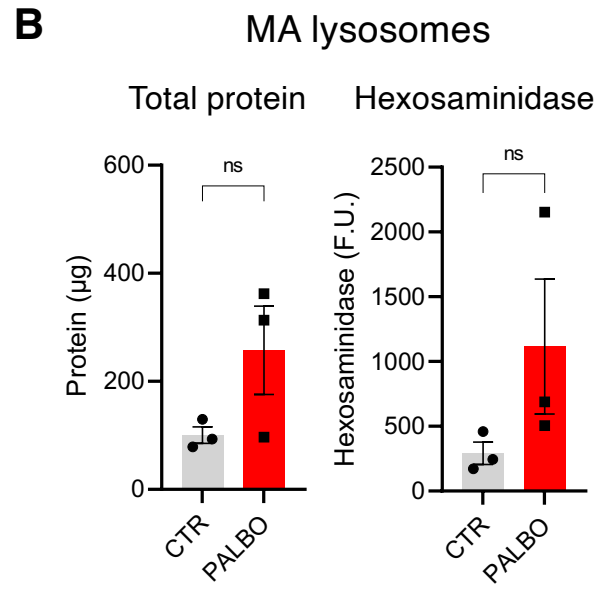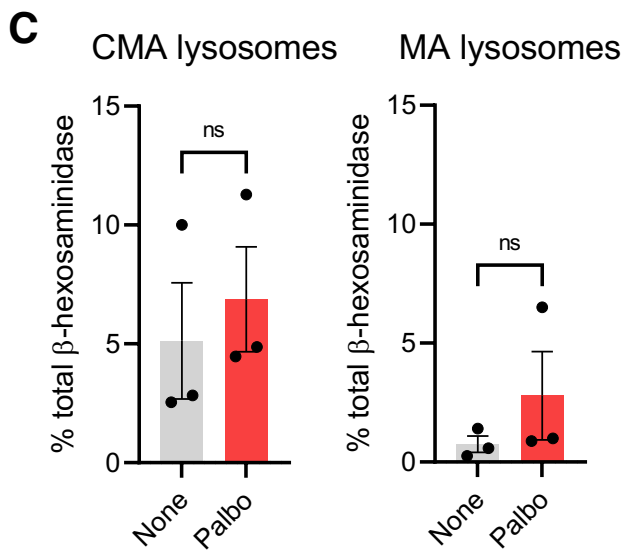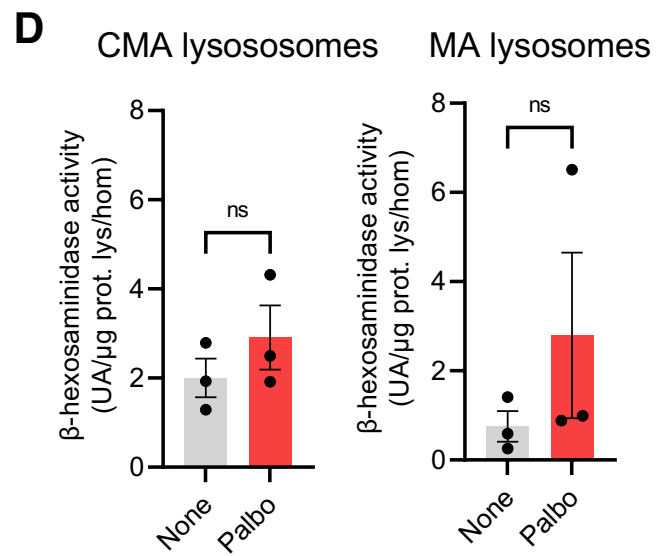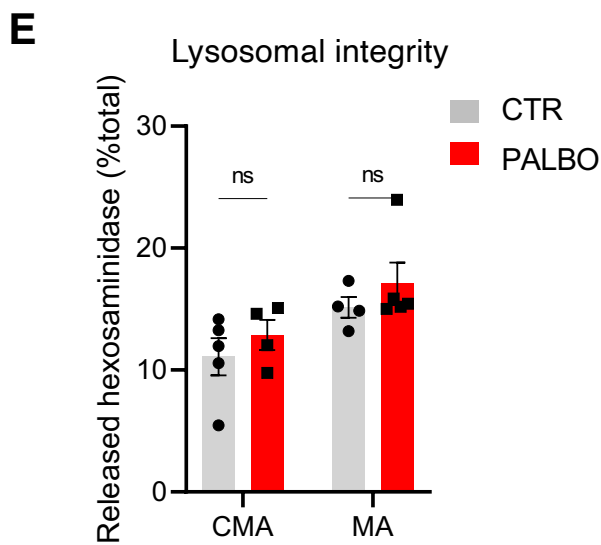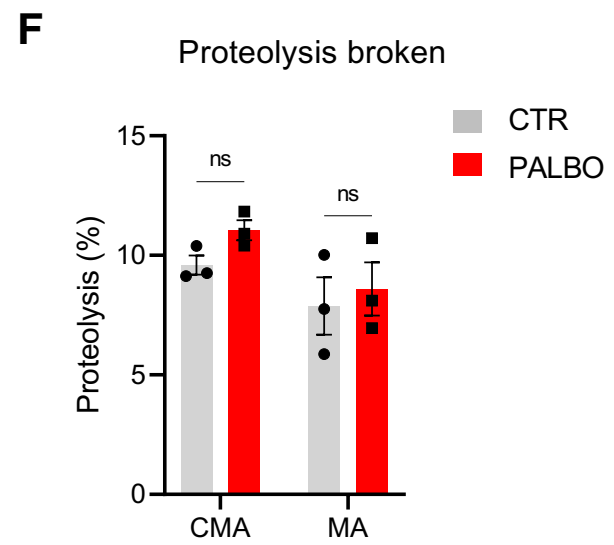

**Supplementary Figure 2**

**Supplementary Figure 2.**

- A,** Total protein (left) and hexosaminidase activity (right) in CMA lysosomes isolated from control or 7 days after palbociclib treatment of SK-MEL-103 cells. Values are individual values and mean  $\pm$  SEM of three different isolations. FU: fluorescence units
- B,** Total protein (left) and hexosaminidase activity (right) in MA lysosomes isolated from control or 7 days palbociclib-treated SK-MEL-103 cells. Values are individual values and mean  $\pm$  SEM of three different isolations. FU: fluorescence units
- C,** Percentage of total cellular hexosaminidase activity recovered in CMA (left) and MA (right) lysosomes isolated as in A and B. Values are individual values and mean  $\pm$  SEM of three different isolations.
- D,** Enrichment for hexosaminidase activity in CMA (left) and MA (right) lysosomes isolated as in A and B calculated as units of activity (UA) per  $\mu$ g of protein in the fractions relative to activity in the homogenate. Values are individual values and mean  $\pm$  SEM of three different isolations.
- E,** Lysosomal membrane stability measured as the percentage of lysosomal  $\beta$ -hexosaminidase activity detectable in the media relative to total  $\beta$ -hexosaminidase in the lysosomal preparations. Values are individual values and mean  $\pm$  SD, n=4.
- F,** Proteolytic capacity of luminal content of CMA and MA lysosomes isolated from control or 7 days palbociclib-treated SK-MEL-103 cells. Values are individual values and mean  $\pm$  s.e.m, n=3.

Statistical significance was estimated by unpaired t-test (A-D) and two-way ANOVA and Sidak's multiple comparisons test (E, F). n.s.: non-significant.

**A**

**CMA LYSOSOMES**

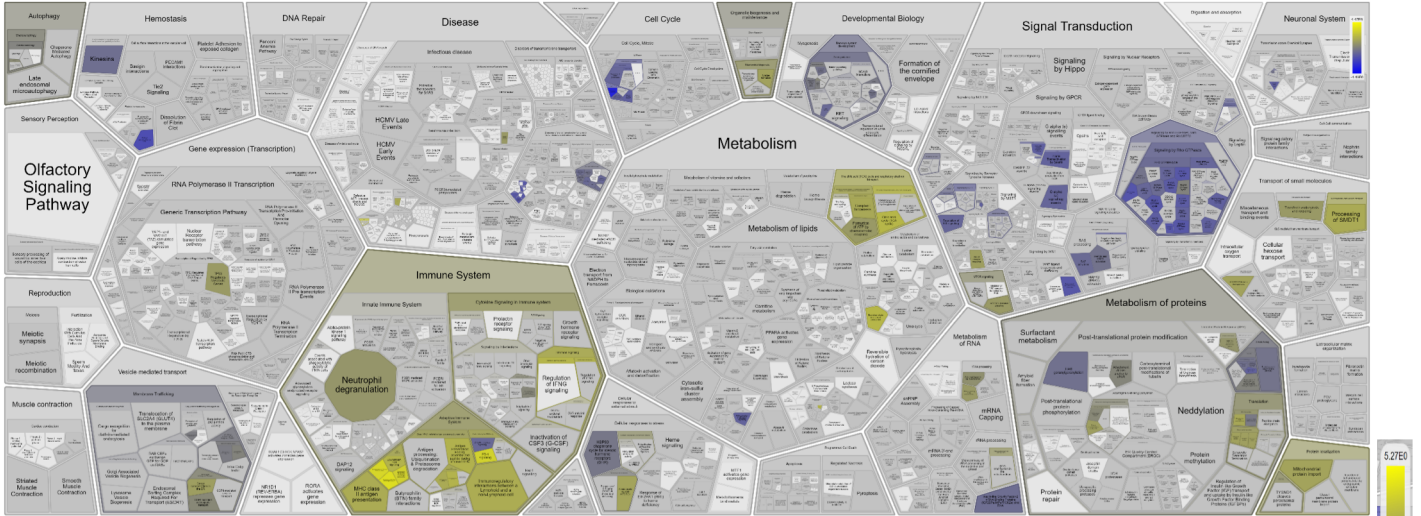

**MA LYSOSOMES**

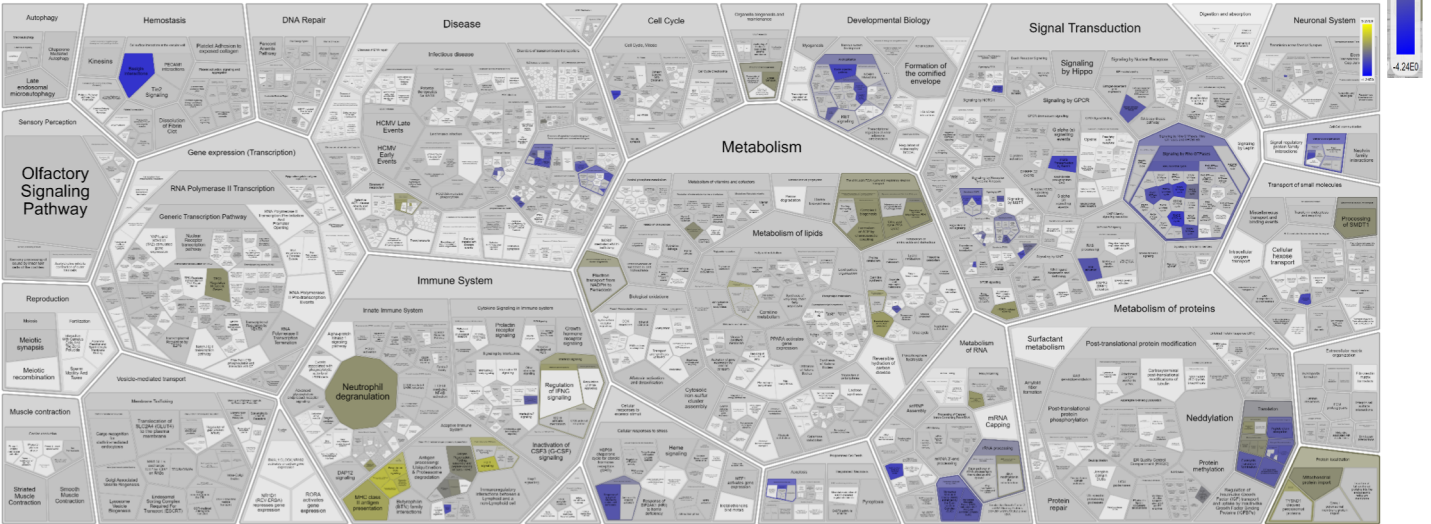

**B**

| CHANGES IN CMA LYSOSOMES ONLY                                                                                                                                                                                                                                         | CHANGES IN MA LYSOSOMES ONLY                                                                                                                                                                                      | CHANGES IN CMA AND MA LYSOSOMES                                                                                                                                                                                                |
|-----------------------------------------------------------------------------------------------------------------------------------------------------------------------------------------------------------------------------------------------------------------------|-------------------------------------------------------------------------------------------------------------------------------------------------------------------------------------------------------------------|--------------------------------------------------------------------------------------------------------------------------------------------------------------------------------------------------------------------------------|
| <ul style="list-style-type: none"> <li>↑ Iron uptake/transport</li> <li>↑ Cargo concentration in ER</li> <li>↑ COPI-mediated transport</li> <li>↑ Transferrin endocytosis</li> <li>↓ Rab-genylation</li> <li>↓ Kinesins</li> <li>↓ Intra Golgi trafficking</li> </ul> | <ul style="list-style-type: none"> <li>↑ Cell junction organization</li> <li>↓ Strogen-stimulated signals</li> <li>↓ Cell junction adherines</li> <li>↓ Apoptotic proteins</li> <li>↓ Reeling and Robo</li> </ul> | <ul style="list-style-type: none"> <li>↑ mTOR signaling</li> <li>↑ TCR downstroom</li> <li>↑ MHC class II antigen presentation</li> <li>↑ PD-1 signaling</li> <li>↓ RhoGTPases</li> <li>↓ CTL4 inhibitory signaling</li> </ul> |

**Supplementary Figure 3.**

- A,** Mosaic gradient representation of the Reactome analysis of proteins with increased (yellow) or reduced (blue) abundance in CMA active lysosomes (top) and MA lysosomes (bottom) in 7 days palbociclib-treated cells SK-MEL-103 cells compared to control cells.
- B,** Cellular pathways of proteins that change in senescent SK-MEL-103 cells compared with control only in CMA lysosomes, only in MA lysosomes or that change in both. Arrow indicates decreased (blue) or increased (orange) levels in senescent cells.

**A**

## Upregulated in CMA lysosomes

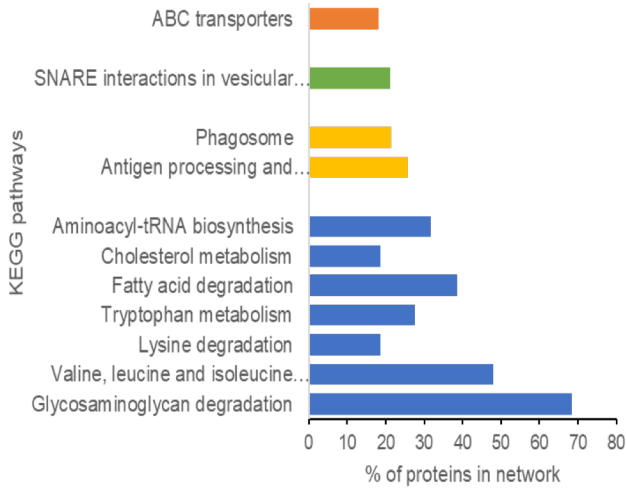

## Downregulation in CMA lysosomes

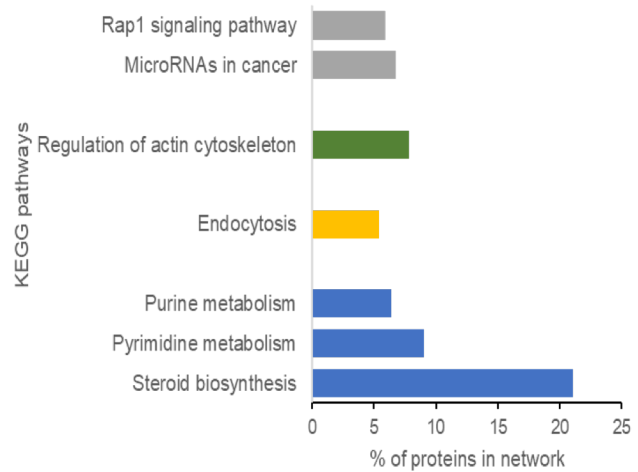**B**

## Upregulated in MA lysosomes

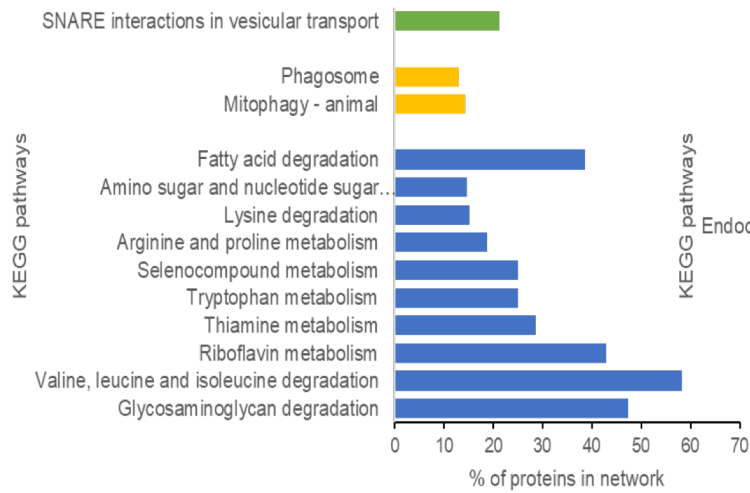

## Downregulated in MA lysosomes

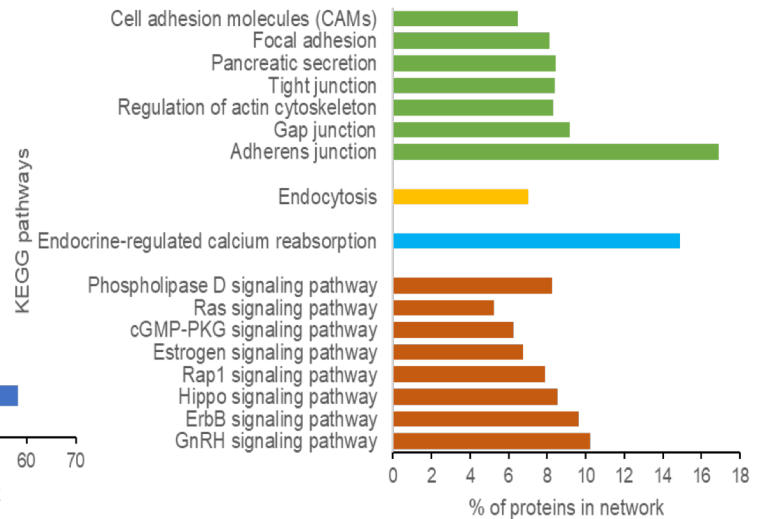

**Supplementary Figure 4.**

- A,** GO terms gene sets of proteins defined as resident lysosomal proteins that show higher (left) or lower (right) levels in CMA lysosomes from SK-MEL-103 senescent cells. Constitutive resident proteins were defined as those that do not change significantly  $p > 0.05$  in N/L vs vehicle or that have a negative log<sub>2</sub> fold change N/L vs vehicle.
- B,** GO terms gene sets of proteins defined as resident lysosomal proteins that show higher (left) or lower (right) levels in MA lysosomes from SK-MEL-103 senescent cells. Constitutive resident proteins were defined as those that do not change significantly  $p > 0.05$  in N/L vs vehicle or that have a negative log<sub>2</sub> fold change N/L vs vehicle.



**A** Only degraded by MA in senescence (165)

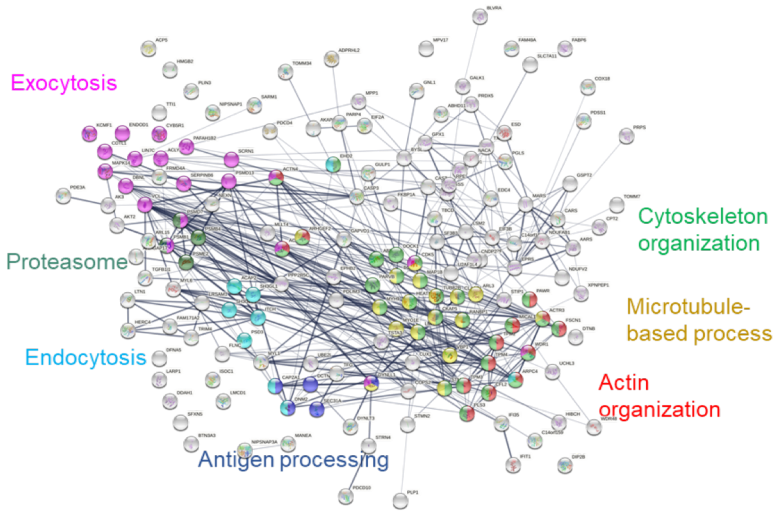

**B** No longer degraded by MA (37)

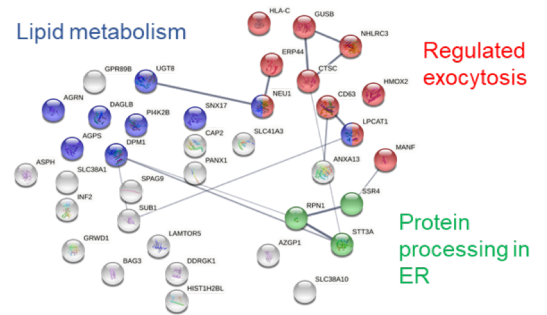

**C** Only degraded by CMA in senescence (47)

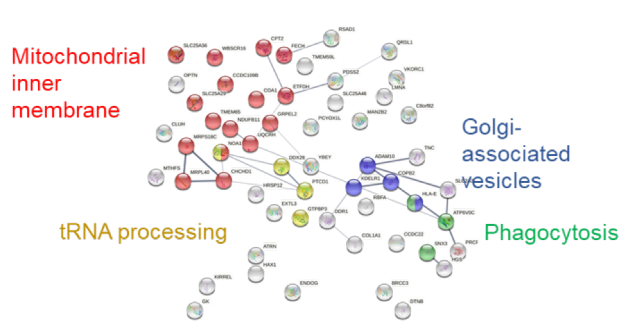

**D** No longer degraded by CMA (83)

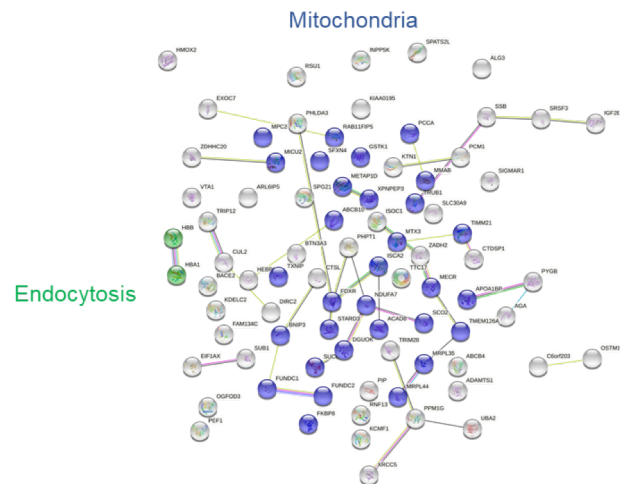

**Supplementary Figure 5.**

**A, B,** STRING analysis of proteins identified in the proteomic analysis of lysosomes isolated from control or 7 days palbociclib-treated SK-MEL-103 cells that are only degraded (**A**) or no longer degraded (**B**) by MA in senescent cells. Substrate proteins were defined as those that accumulate significantly upon N/L treatment, *i.e.*, log<sub>2</sub> fold change N/L vs vehicle >0.21 (fold >1.1) and *p* value <0.05.

**C, D,** STRING analysis of proteins identified in the proteomic analysis of lysosomes isolated from control or 7 days palbociclib-treated SK-MEL-103 cells that are only degraded (**C**) or no longer degraded (**D**) by CMA in senescent cells. Substrate proteins were defined as those that accumulate significantly upon N/L treatment, *i.e.*, log<sub>2</sub> fold change N/L vs vehicle >0.21 (fold >1.1) and *p* value <0.05.

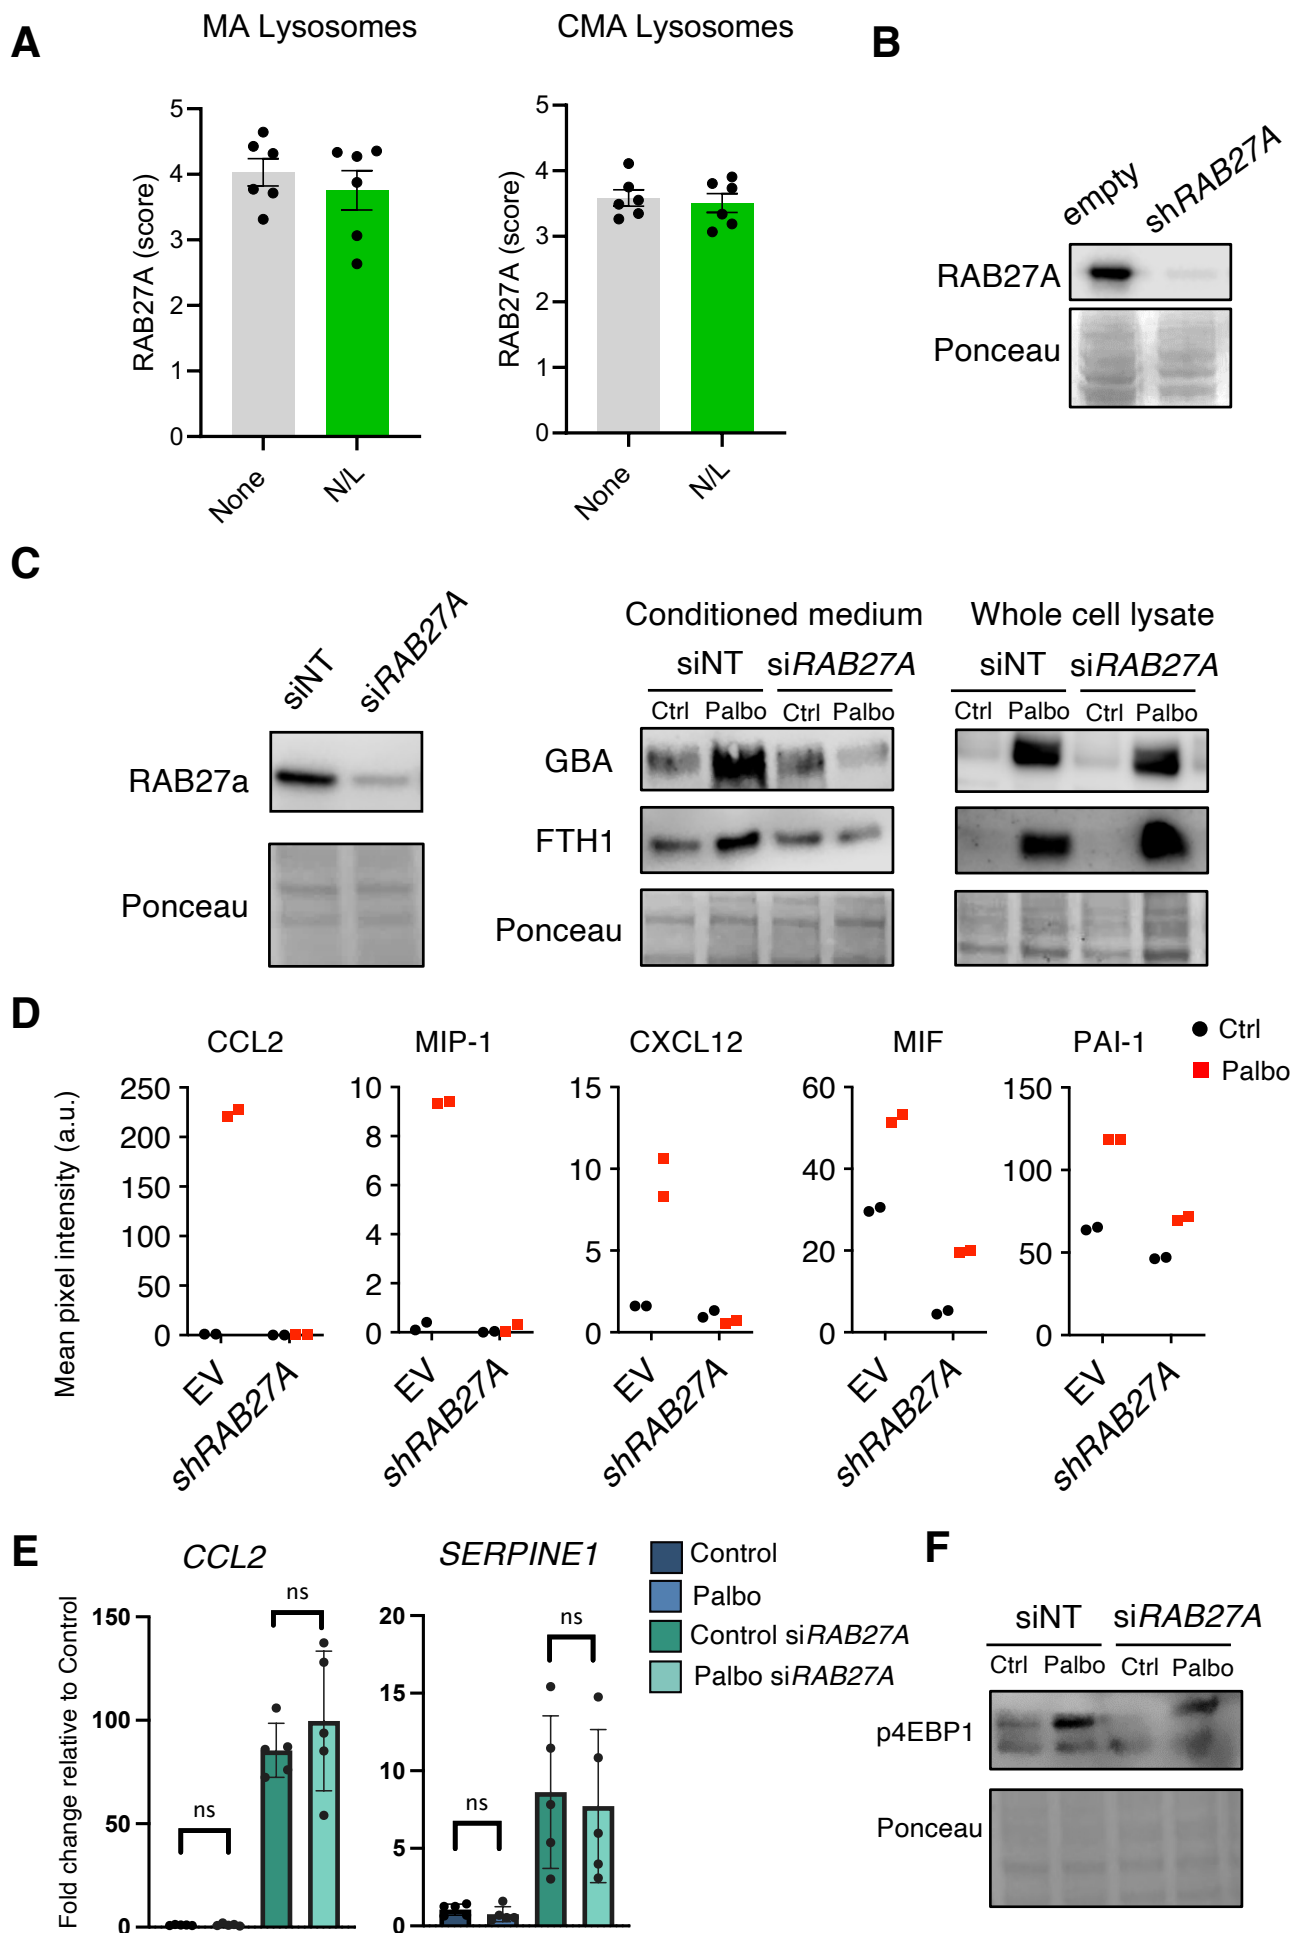

Supplementary Figure 6

**Supplementary Figure 6.**

- A,** Levels of RAB27A in MA (left) and CMA (right) lysosomes isolated from SK-MEL-103 cells cultured without additions (none) or in the presence of 10 mM ammonium chloride and 100  $\mu$ M leupeptin for 16h before isolation. Individual values and mean  $\pm$  SEM from three different isolations in duplicate are shown. Values are expressed as Z score were extracted from the MS proteomic analysis.
- B,** Confirmation of the knock-down of RAB27A using lentiviral shRNA or empty vector in SK-MEL-103 cells.
- C,** Confirmation of the knock-down of RAB27A using siRNAs in SK-MEL-103 cells (left). Analysis of the levels of GBA and FTH1 in SK-MEL-103 cells, control or senescent, treated or not with siRNAs targeting RAB27A (right). Protein levels were analyzed in the conditioned medium and in whole-cell extracts
- D,** Profiles of mean spot pixel density for the cytokines and chemokines indicated in Fig. 7E. EV, empty vector; sh, lentiviral sh*RAB27A*.
- E,** Levels of mRNA for the indicated genes in SK-MEL-103 cells, control or senescent (palbociclib), treated with non-targeting siRNAs (siNT) or with siRNAs targeting *RAB27A* (si*RAB27A*).
- F,** Levels of phospho-4EBP1 in the same cells as in panel E.  
Statistical significance was estimated by t-test, n.s.: non-significant.
